# Supplementary material for: Density-functional description of alkalides: introducing the alkalide state
Source: Royal Society of Chemistry journal article supplement (doi:10.1039/c8cp04014a), 2018-01-01
Supplement: c8cp04014a1.pdf [file c8cp04014a1.pdf]

## Supporting Information: Density Functional Description of Alkalides: Introducing the Alkalide State

Stephen G. Dale,<sup>1,\*</sup> Erin R. Johnson,<sup>1,†</sup> and Axel D. Becke<sup>1,‡</sup>

<sup>1</sup>*Department of Chemistry, Dalhousie University, 6274 Coburg Rd,  
P.O.Box 15000 B3H 4R2, Halifax, Nova Scotia, Canada*

---

---

\*Electronic address: [stephen.dale@dal.ca](mailto:stephen.dale@dal.ca)

†Electronic address: [erin.johnson@dal.ca](mailto:erin.johnson@dal.ca)

‡Electronic address: [axel.becke@dal.ca](mailto:axel.becke@dal.ca)

TABLE I: List of the alkalide crystals for which calculations were conducted in this work and the. QTAIM charges for the alkali cations and anions, and atomic volumes for the alkali anions (in atomic units), are also given. No atomic relaxation is permitted.

| CSD Code | Formula                                                         | Alkali Charge | Alkalide Charge | Alkalide Volume |
|----------|-----------------------------------------------------------------|---------------|-----------------|-----------------|
| REGCIP   | $\text{Rb}^+(18\text{C}6)(\text{CH}_3\text{NH}_2)\text{Na}^-$   | 0.857         | -0.417          | 645.0           |
| FABMEA10 | $\text{Rb}^+(15\text{C}5)_2\text{Na}^-$                         | 0.888         | -0.462          | 745.8           |
| ROGDEW   | $\text{Li}^+(\text{C}211)\text{Na}^-$                           | 0.892         | -0.478          | 711.2           |
| COJDIO   | $\text{Li}^+(18\text{C}6)(\text{CH}_3\text{NH}_2)_2\text{Na}^-$ | 0.888         | -0.388          | 662.5           |
| REGCAH   | $\text{K}^+(12\text{C}4)_2\text{Na}^-$                          | 0.872         | -0.472          | 734.2           |
| FABMAW10 | $\text{Cs}^+(18\text{C}6)_2\text{Na}^-$                         | 0.917         | -0.432          | 709.1           |
| JEPMEW   | $\text{Cs}^+(15\text{C}5)_2\text{K}^-$                          | 0.898         | -0.413          | 1081.7          |
| JAPVEB   | $\text{K}^+(\text{C}222)\text{K}^-$                             | 0.866         | -0.392          | 945.8           |
| JEPMIA   | $\text{Rb}^+(15\text{C}5)_2\text{Rb}^-$                         | 0.889         | -0.264          | 1000.9          |
| JAPVOL   | $\text{Rb}^+(18\text{C}6)\text{Rb}^-$                           | 0.786         | -0.396          | 987.5           |
| JAPVIF   | $\text{Rb}^+(\text{C}222)\text{Rb}^-$                           | 0.862         | -0.365          | 1005.7          |
| FUJDAP   | $\text{Cs}^+(\text{C}222)\text{Cs}^-$                           | 0.865         | -0.360          | 1225.5          |
| REJBAK   | $\text{Li}^+(\text{C}211)\text{Cs}^-$                           | 0.891         | -0.220          | 1052.7          |
